# Supplementary material
Source: publisher site journal article supplement (http://kjim.org/upload/media/kjim-2019-030-suppl1.pdf)
Supplement: Supplementary file 1 [file kjim-2019-030-suppl1.pdf]

**Supplementary Table 1. Baseline characteristics according to sex (total n = 4,990)**

| Characteristic                     | Male (n = 2,665)           | Female (n = 2,325)         | p value |
|------------------------------------|----------------------------|----------------------------|---------|
| <b>Demographic data</b>            |                            |                            |         |
| Age, yr                            | 65.3 ± 14.8                | 71.8 ± 13.8                | < 0.001 |
| Body mass index, kg/m <sup>2</sup> | 23.6 ± 3.8                 | 23.1 ± 4.0                 | < 0.001 |
| <b>Past medical history</b>        |                            |                            |         |
| Hypertension                       | 1,486 (55.8)               | 1,483 (63.8)               | < 0.001 |
| Diabetes mellitus                  | 996 (36.2)                 | 83 (35.7)                  | 0.710   |
| Heart failure                      | 1,093 (41.0)               | 1,021 (43.9)               | 0.039   |
| Ischemic heart disease             | 853 (32.0)                 | 582 (25.0)                 | < 0.001 |
| Valvular heart disease             | 309 (11.6)                 | 420 (18.1)                 | < 0.001 |
| Chronic obstructive lung disease   | 352 (13.2)                 | 197 (8.5)                  | < 0.001 |
| Chronic kidney disease             | 414 (15.5)                 | 284 (12.2)                 | 0.001   |
| Cerebrovascular accident           | 429 (16.1)                 | 342 (14.7)                 | 0.174   |
| <b>Social history</b>              |                            |                            |         |
| Smoking history                    |                            |                            | < 0.001 |
| Current smoker                     | 826 (31.0)                 | 110 (4.7)                  |         |
| Ex-smoker                          | 942 (35.3)                 | 76 (3.3)                   |         |
| Never smoker                       | 897 (33.7)                 | 2,139 (92.0)               |         |
| <b>Alcohol history</b>             |                            |                            |         |
| Heavy drinker                      | 327 (12.3)                 | 22 (0.9)                   |         |
| Social drinker                     | 1,289 (48.4)               | 291 (12.5)                 |         |
| Never drinker                      | 1,049 (39.4)               | 2,012 (86.5)               |         |
| <b>Major ECG abnormalities</b>     |                            |                            |         |
| Atrial fibrillation                | 703 (26.4)                 | 689 (29.6)                 | 0.011   |
| Right bundle branch block          | 222 (8.3)                  | 138 (5.9)                  | 0.001   |
| Left bundle branch block           | 119 (4.5)                  | 150 (6.5)                  | 0.002   |
| <b>NYHA functional class</b>       |                            |                            |         |
| Stage II                           | 437 (16.4)                 | 321 (13.8)                 |         |
| Stage III                          | 978 (36.7)                 | 835 (35.9)                 |         |
| Stage IV                           | 1,250 (46.9)               | 1,169 (50.3)               |         |
| <b>Physical exam</b>               |                            |                            |         |
| SBP, mmHg                          | 130.1 ± 30.7               | 134.3 ± 29.9               | < 0.001 |
| DBP, mmHg                          | 78.9 ± 19.3                | 79.3 ± 18.4                | 0.403   |
| HR, beats/min                      | 92.2 ± 25.8                | 93.4 ± 25.6                | 0.110   |
| <b>Laboratory exam</b>             |                            |                            |         |
| Hemoglobin, mg/dL                  | 14.6 ± 2.2                 | 14.7 ± 1.9                 | 0.272   |
| Sodium, mmol/L                     | 137.6 ± 4.6                | 137.6 ± 5.0                | 0.681   |
| Potassium, mmol/L                  | 4.4 ± 0.7                  | 4.3 ± 0.7                  | < 0.001 |
| BUN, mg/dL                         | 26.5 ± 16.4                | 25.4 ± 16.2                | 0.013   |
| Creatinine, mg/dL                  | 1.6 ± 1.7                  | 1.3 ± 1.2                  | < 0.001 |
| BNP, pg/mL                         | 854.0 (443.0–1,667.0)      | 936.0 (504.4–1,821.8)      | 0.115   |
| NT-proBNP, pg/mL                   | 4,349.0 (1,975.0–10,301.0) | 5,366.0 (2,379.0–13,763.0) | < 0.001 |
| <b>Medication at admission</b>     |                            |                            |         |

**Supplementary Table 1. Continued**

| Characteristic                                       | Male (n = 2,665) | Female (n = 2,325) | p value |
|------------------------------------------------------|------------------|--------------------|---------|
| Beta-blockers                                        | 716 (26.9)       | 704 (30.3)         | 0.008   |
| Renin-angiotensin-system inhibitors                  | 1,010 (37.9)     | 880 (37.8)         | 0.971   |
| Mineralocorticoid receptor blockers                  | 459 (17.2)       | 451 (19.4)         | 0.047   |
| <b>Medication at discharge</b>                       |                  |                    |         |
| Beta-blockers                                        | 1,330 (49.9)     | 1,090 (46.9)       | 0.033   |
| Renin-angiotensin-system inhibitors                  | 1,820 (68.3)     | 1,510 (64.9)       | 0.012   |
| Mineralocorticoid receptor blockers                  | 1,187 (44.5)     | 1,066 (45.8)       | 0.354   |
| <b>Echocardiographic findings</b>                    |                  |                    |         |
| Left ventricular end diastolic diameter, mm          | 60.1 ± 9.9       | 54.4 ± 9.3         | < 0.001 |
| Ejection fraction, %                                 | 34.6 ± 14.6      | 41.4 ± 15.8        | < 0.001 |
| Heart failure with reduced ejection fraction (< 50%) | 2,150 (83.7)     | 1,531 (68.3)       | < 0.001 |

Values are presented as mean ± SD, number (%), or median (interquartile range).

ECG, electrocardiogram; NYHA, New York Heart association; SBP, systolic blood pressure; DBP, diastolic blood pressure; HR, heart rate; BUN, blood urea nitrogen; BNP, B-type natriuretic peptide; NT-proBNP, N-terminal proBNP.
